# Supplementary material for: Analysis of Trade-offs between Food Security and Water-Land Savings through Food Trade and Structural Changes of Virtual Water Trade in the Arab World
Source: Copernicus journal article supplement (doi:10.5194/hess-2018-4), 2018-01-17
Supplement: Supplementary file [file hess-2018-4-SC1-supplement.pdf]

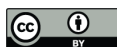

# 1 Analysis of Trade-offs between Food Security and Water-Land 2 Savings through Food Trade and Structural Changes of Virtual 3 Water Trade in the Arab World

4 Sang-Hyun Lee<sup>1</sup>, Rabi H. Mohtar<sup>1</sup>, Seung-Hwan Yoo<sup>2</sup>

5 <sup>1</sup>Department of Biological and Agricultural Engineering, Texas A&M University, College station, TX77840, USA

6 <sup>2</sup>Department of Rural and Bio-systems Engineering, Chonnam National University, Gwangju, Republic of Korea

7 Correspondence to: Rabi H. Mohtar (mohtar@tamu.edu)

## 8 Abstract

9 The aim of this study is to analyze the impacts of food trade on food security and water-land savings in the Arab World in  
10 terms of virtual water trade (VWT). We estimated the total volume of virtual water imported for four major crops—barley,  
11 maize, rice, and wheat—from 2000 to 2012, and assessed their impacts on water and land savings, and food security. The  
12 largest volume of virtual water was imported by Egypt (19.9 billion m<sup>3</sup>/year), followed by Saudi Arabia (13.0 billion m<sup>3</sup>/  
13 year). Accordingly, Egypt would save 13.1 billion m<sup>3</sup> in irrigation water and 2.1 million ha of crop area through importing  
14 crops. In addition, connectivity and influence of each country in the VWT network was analyzed using degree and  
15 eigenvector centralities. The study revealed that the Arab World focused more on increasing the volume of virtual water  
16 imported during the period 2006-2012 with little attention to the expansion of connections with country exporters, which is a  
17 vulnerable expansion. This study shed light on opportunities and risks associated with VWT and its role in food security and  
18 land management in the Arab World.

19

20 Keyword: Food security, Arab World, Virtual water trade; Degree centrality; Eigenvector centrality

## 21 1 Introduction

22 Food trade is an important element of food security in water-scarce regions (Konar et al., 2012; Hanjra and Qureshi, 2010;  
23 Hoekstra, 2003) because food trade drives water conservation or loss in terms of the virtual water trade (VWT), which refers  
24 to the trade of water embedded in food products (Allan, 1993; Aldaya et al., 2010; Antonelli and Tamea, 2015). The concept  
25 and quantitative estimates of virtual water can help in realistically assessing water scarcity for each country, projecting  
26 future water demand for food supply, increasing public awareness about water, and identifying water-wasting processes in  
27 production (Oki and Kanae, 2004). For water-scarce countries, achieving water security through importing water intensive  
28 products could be a more attractive option, compared to producing all water-demanding products domestically (Hoekstra and  
29 Hung, 2005). The global volume of international crop-related virtual water flows averaged 695 billion m<sup>3</sup>/year over the  
30 period 1995–1999, meaning that 13% of the water used for crop production in the world was not used for domestic  
31 consumption but rather for export in virtual form (Hoekstra and Hung, 2005). The International Water Management Institute  
32 (IWMI) and the Government Office for Science both state that the VWT could contribute to relieve water stress through  
33 using global water more efficiently, in the event of an increase in global food trade (Government Office for Science,  
34 London, 2011; Molden, 2007). In addition, Falkenmark and Lannerstad (2010) estimated that it would be necessary to  
35 double the VWT by 2050 to compensate for agricultural water deficits.

36 The VWT has been suggested as relevant to the water policy of a nation (Schyns and Hoekstra, 2014), providing a new point  
37 of view from which both food security and sustainable water management are considered (Novo et al., 2009). The VWT and  
38 the respective savings garnered through the trade of agricultural goods have been quantified in a number of studies. Oki and



39 Kanae (2004) investigated whether VWT could save global water resources and determined that “real water” in exporting  
40 countries tends to be smaller than “virtual water” in importing countries. For example, approximately 1140 km<sup>3</sup>/year of  
41 virtual water was imported through the food trade, e.g., cereals, soybeans, and meat; however, 680 km<sup>3</sup>/year of real water  
42 was used to produce those foods in exporting areas. This is due to the difference between crop water requirement between  
43 the importing and exporting country, with the later usually lower. Yang et al. (2006) revealed that the VWT could generate a  
44 global water saving because virtual water has flown primarily from countries of high crop water productivity to countries of  
45 low crop water productivity. In their study, globally, 336.8 km<sup>3</sup>/year of virtual water was saved by the international trade of  
46 major food crops from 1997 to 2001, and 20.4% of the total global net virtual water import was imported to countries that  
47 have water availability below 1700 m<sup>3</sup> per capita, such as Arab countries. Fader et al. (2011) showed that the trade of crop  
48 products saves 263 km<sup>3</sup>/year of virtual water, globally, representing 3.5% of the annual precipitation on cropland. In  
49 particular, water-scarce countries, such as China and Mexico, but also The Netherlands and Japan, saved large amounts of  
50 water by importing goods—from 25 to 73 km<sup>3</sup> of water—because they would need relatively large amounts of water to  
51 produce the goods they import. According to the study by Biewald et al. (2014), blue water saving from international trade  
52 can bring enormous benefits in water-scarce regions; for example, 17 billion m<sup>3</sup> of blue water per year were saved by the  
53 global food trade, and the value of blue water saving was estimated to 2.4 billion US\$.

54 Previous studies showed that the effective import of virtual water may reduce water use for domestic food production in  
55 importing countries and help alleviate water stress in water-scarce regions, such as the Arab World where the largest water  
56 deficit in the world exists (Gleick, 2000; World Bank, 2009). The critical condition of water scarcity in the Arab world will  
57 reach severe levels by 2025 (Tolba, 2009). In addition, if population increases rapidly and urbanization continues fast,  
58 availability of water could be reduced in Arab countries by about 50% by the year 2025 (Abahussain et al., 2002). Water  
59 shortages will certainly speed up the rate of desertification in the Arab countries with a larger deficit in freshwater  
60 (Abahussain et al., 2002). Agricultural water withdrawals account for over 85% of the total water withdrawn throughout the  
61 many countries of the Arab World (FAO, 2014). Irrigation systems in the Arab World are based on pumping groundwater  
62 resources such as aquifers, and water security is being threatened by declining aquifer levels and the extraction of non-  
63 renewable groundwater (Antonelli and Tamea, 2015). In addition, Immerzeel et al. (2011) expected that the unfulfilled water  
64 demand in the entire Arab World would increase from the current level of 16% to 51% in 2040–2050 due to climate change.  
65 The IPCC projections also indicate that rainfall in the Arab region will become intense, and dry spells will become more  
66 pronounced. In addition, the zone of severely-reduced rainfall extends throughout the Mediterranean region and the northern  
67 Sahara (Hennessy et al., 2007). Milly et al. (2005) identify that climate change causes a drop in water run-off by 20% to 30%  
68 in most of Middle East North Africa (MENA) by 2050, mainly due to rising temperatures and lower precipitation. In  
69 addition, the regions including Syria, Lebanon, Israel, and Jordan will get drier, with significant rainfall decrease in the wet  
70 season.

71 Accordingly, food trade can be regarded as the most important factor for saving domestic water resources and decreasing  
72 water stress in addition to improving food security in the Arab World. This study addresses three questions that relate to the  
73 role and impact of the VWT in the Arab World, which are raised to draw attention to the complexity of the issue and the  
74 need for a broader view in assessment. These questions are: 1) What are the effects of the VWT on water savings and land  
75 tenure in the Arab World, 2) Has the structure of the virtual water import in the Arab World been vulnerable or robust? 3)  
76 Who are the influential importers and exporters in VWT network in the Arab World?  
77 The aim of this study is to analyze the quantitative and structural characteristics of VWT in the Arab World in order to  
78 understand the effects on water savings and land tenure from importing crops and identify the temporal changes of VWT  
79 structure.

80 **First, we estimated the total volume of virtual water imported through four major crops—barley, maize, rice, and wheat—in**  
81 **the Arab World from 2000 to 2012, and the effects of importing crops on water and land savings were evaluated in each**

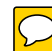



82 Arab country. However, food import can cause a decrease in local food production, which can be particularly a critical issue  
 83 in the Arab World. Accordingly, we estimated water requirement of increasing 1 % self-sufficiency of study crops in  
 84 comparison to average self-sufficiency from 2000 to 2012 in terms of trade-off between water saving and food self-  
 85 sufficiency.  
 86 Second, we analyzed the structural characteristics of the VWT in the Arab World using degree centrality, which represents  
 87 the connectivity of a node in a network system, and categorized the countries in the Arab World in terms of vulnerable  
 88 expansion (or reduction) and robust expansion (or reduction) in the VWT network. In addition, influence of each country  
 89 was analyzed using eigenvector centrality to identify influential countries who could affect the entire VWT network in the  
 90 Arab World. Understanding the VWT structure is important as quantifying the amount of import and export. Recent  
 91 literature has emphasized the change in structure of the VWT in terms of a network approach (Dalin et al., 2012; Konar et  
 92 al., 2012; Lee et al., 2016).

## 93 2 Materials and Methods

### 94 2.1 Calculation of a virtual water trade using food trade and water footprint

95 The VWT represents the water embedded in international trade, and the main factors for quantifying a VWT are trade data  
 96 and water footprint (WFP, m<sup>3</sup>/ton), which is the volume of water used for producing one ton of crops. Therefore, a VWT is  
 97 calculated by multiplying the trade by its associated water footprint, as follows:

$$98 \quad VWT [n_e, n_t, c, t] = CT [n_e, n_t, c, t] \times WFP [n_e, c], \quad (1)$$

99 in which variable VWT denotes the VWT from the exporting country, ne, to the importing country, ni, in year t, as a result  
 100 of trade in crop c; CT represents the crop trade from the exporting country, ne, to the importing country, ni, in year t as a  
 101 result of trade in crop c; and WFP represents the water footprint of crop c in the exporting country, ne.

102 The WFP of a crop is derived from the crop water requirement (m<sup>3</sup>/ha) per yield (kg/ha), as follows:

$$103 \quad WFP [c] = \frac{CWR [c]}{Production [c]}, \quad (2)$$

104 where WFP (m<sup>3</sup>/ton) is water footprint of a crop c, CWR is the crop water requirement, and Production is the yield per year.  
 105 The water footprint for a crop is divided into green and blue water footprints, based on the water resources (Hoekstra and  
 106 Chapagain, 2008). Green water footprint indicates that water supplied by precipitation is retained in the soil of the root zone  
 107 (Falkenmark, 1995), and blue water footprint is the water stored at the surface or in the ground. Therefore, green water  
 108 footprint is related to rain-fed agriculture and blue water footprint is related to irrigation water provided by aquifers or  
 surface bodies of water.

### 109 2.2 Quantification of water and land savings by importing crops using water footprint and land productivity

110 The import of crops could affect the water and land savings in the importing country. Therefore, the failure of trade could  
 111 cause water and land shortages in the Arab World. Therefore, we analyzed water and lands requirements for producing as  
 112 much crop as is imported in each Arab country. In other words, the water and land savings indicated resource requirements  
 113 needed by the shift from crop import to domestic production. Although this assumption about water and land savings  
 114 considers an extreme trade situation, these results could be used to understand how the international crop trade is important  
 115 in the Arab World in terms of water and land savings. The national water and land savings indicated the amount of blue  
 116 water and land requirements for substituting crops imported to domestic production. Thus, it was calculated as follows:

$$117 \quad Water\ saving_{c,i} = Import_{c,i} \times Blue\ water\ footprint_{c,i} \quad (3)$$

$$118 \quad Lands\ saving_{c,i} = Import_{c,i} \times \frac{Lands_{c,i}}{Production_{c,i}} \quad (4)$$



119 where  $c$  and  $i$  indicate crop and importer, and  $w$  indicates the water resource such as ground water, surface water, and treated  
120 water.

### 121 2.3 Analysis of degree and eigenvector centrality in the virtual water trade network

122 The VWT network indicates flows of virtual water among countries through crop trade, and thus, it consists of volume and  
123 links. In this study, we considered both volume and links of the VWT network for identifying changes in VWT structure, for  
124 example, vulnerable expansion (or reduction) and robust expansion (or reduction). Therefore, it is important to estimate the  
125 connectivity in a VWT network. Therefore, we applied the degree centrality, which is the number of edges incident on a  
126 given node (Freeman 1979). Degree centrality is divided into in- and out-degree centralities, depending on the direction, and  
127 the in-degree centrality of each Arab country was calculated because we focused more on the import of virtual water in the  
128 Arab World. An importer accompanying a high in-degree centrality has expanded connectivity with exporters, meaning that  
129 this importer could cope with an accidental disconnection from a certain exporter. A few studies that analyze the structure of  
130 the VWT using a network-based approach have been conducted (Konar et al., 2012; Dalin et al., 2012; Lee et al., 2016). The  
131 degree centrality of the VWT is:

$$132 C_i = \sum_j^N VWT_{ij} / (N - 1), \quad (5)$$

133 where  $C_i$  is the degree centrality of country  $i$  and  $N$  is the number of total countries.  $VWT_{ij}$  is the link between the  $i$ th and  
134  $j$ th countries.

135 The entire network can be affected by a few nodes, which is influential nodes, and it is important to identify these nodes for  
136 understanding and estimating the change of entire network system. An eigenvector centrality can measure important and  
137 influence of each node in the entire network, and it is related not only of own connection but also connection of other node  
138 which connects to own. Therefore, a node is more influential if it is in relation with the nodes that are, themselves, influential  
139 (Ruhnau, 2000). The eigenvector centrality assigns relative centrality to all of the nodes in the network, based on the  
140 principle that connections to high-level centrality nodes contribute more to the centrality of the nodes than equal connections  
141 to low-level centrality nodes (Ruhnau, 2000; Lee et al., 2016). Therefore, the eigenvector centrality of node is related to both  
142 the number of links to partners and their centrality (Ruhnau, 2000). Bonacich (1972) defined the centrality  $c(v_i)$  of a node  $v_i$   
143 as the positive multiple of the sum of adjacent centralities, as follows:

$$144 \lambda c(v_i) = \sum_{j=1}^n \alpha_{ij} c(v_j) \quad \forall i. \quad (6)$$

145 In matrix notation, with  $c = (c(v_1), \dots, c(v_n))$ , the above equation yields

$$146 Ac = \lambda c \quad (7)$$

147 Eigenvector centrality is determined by calculating the principal eigenvector that has the largest eigenvalue among every  
148 eigenvector. An eigenvector of the maximal eigenvalue with only non-negative entries does exist, and we call a non-negative  
149 eigenvector ( $c \geq 0$ ) of the maximal eigenvalue the principal eigenvector, and we call the entry  $c(v_i)$  the eigenvector-  
150 centrality of node  $v_i$  (Ruhnau, 2000).

### 151 2.4 Data collection and limitations of data availability

152 A main data set was international trade, and the international trade data of the study crops from 2000 to 2012 was obtained  
153 from FAOSTAT (<http://www.fao.org/faostat/>), as shown in Table 1. The crop with the largest amount of import was wheat,  
154 with 359.7 million ton imported by the Arab World from 2000 to 2012, followed by maize (187.2 million ton), barley (116.4  
155 million ton), and rice (49.0 million ton). Most of the Arab countries increased the imports of the four major crops from 2000  
156 to 2012. In particular, the largest increase was represented in Egypt, for example, the amount of the imported crops in Egypt  
157 was 11.2 million ton in 2000 and it increased to 18.0 million ton in 2012.

158 To quantify VWT and assess its effect on water and land savings, water footprint data of crops was essential. However,  
159 water footprint of crops is based on crop water requirement and irrigation, thus various data are required for calculating it,



160 for example climate data, crop information, irrigation scheduling, and soil characteristics. In addition, each variable is  
161 dependent on local characteristics, thus the study for national water footprint should be executed for each country, basin, or  
162 specific area, and it was out of the scope of this study. Therefore, the estimation of water footprint was not included but we  
163 applied water footprint data set from the study executed by Mekonnen and Hoekstra (2010). They estimated the average  
164 value of green and blue water footprints of crops and crop products at the national level from 1996 to 2005. In addition, the  
165 blue water footprint and land productivity for each country in the Arab World were applied to assess effects on water and  
166 land savings from importing crops. The blue water footprint for each country in the Arab World was also obtained from  
167 Mekonnen and Hoekstra (2010). Land productivity was calculated by the harvest area and crop production, which were  
168 collected from FAOSTAT (<http://www.fao.org/faostat/>), as shown in Table 2. Internal water resource and land area in each  
169 country were collected from World Bank (<http://data.worldbank.org>).  
170 However, time scales of international trade were different from water footprint data. For example, water footprints used in  
171 this study were based on data from 1995 to 2005; however, we applied the food trade data from 2000 to 2012. Therefore, the  
172 application of average water footprint to time-series trade data can cause a false estimate of the effects of VWT. However,  
173 the water footprint data indicated the representative index using average value, and the part of periods for water footprint is  
174 overlapped with the period of trade data. Therefore, even if there is limitation of data availability, the water footprint data  
175 from Mekonnen and Hoekstra (2010) can be used for estimating VWT in this study.  
176 **Table 1.** The amount of crops imported by the Arab World from 2000 to 2012 (FAOSTAT).  
177 **Table 2.** Cultivation area and production of four major crops in the Arab World.

### 178 3 Results and Discussion

#### 179 3.1 Quantification of virtual water trade in the Arab World from 2000 to 2012

180 The total amount of green and blue water imported by each Arab country from 2000 to 2012 reached 921.2 and 80.5 billion  
181 m<sup>3</sup>, respectively, in the Arab World, is shown in Table 3 and Figure 1. The largest volume of green water was annually  
182 imported by Egypt (19.1 billion m<sup>3</sup>/year), followed by Saudi Arabia (11.9 billion m<sup>3</sup>/year). In addition, the largest amount of  
183 blue water was imported annually by Saudi Arabia (1.2 billion m<sup>3</sup>/year), followed by the UAE (0.9 billion m<sup>3</sup>/year). Over 70%  
184 of the green water imported into the Arab World annually through the barley trade (approximately 8.5 billion m<sup>3</sup>/year) went  
185 to Saudi Arabia. The amount of virtual water imported through the trade of maize was 13.0 billion m<sup>3</sup>/year, with Egypt as the  
186 primary importer, importing 31% of the total imported into the Arab World. Rice is a blue-water-intensive crop, and the  
187 importers of rice also import a lot of water. About 3.0 billion m<sup>3</sup>/year of blue water were imported in the rice trade from 2000  
188 to 2012, and Saudi Arabia, the UAE, and Iraq were the primary importers. The largest volume of virtual water imported by  
189 the Arab World was due to wheat trade. The annual amount of virtual water imported through wheat trade in the Arab World  
190 from 2000 to 2012 was approximately 42.6 billion m<sup>3</sup>/year, but the amount of blue water was only 2.0 billion m<sup>3</sup>/year. Over  
191 35% of the virtual water imported through the wheat trade was imported by Egypt (15.7 billion m<sup>3</sup>/year).  
192 The volume of virtual water imports per capita (VW<sub>Icap</sub>) indicates how the countries are dependent on water resources from  
193 abroad. Figure 2 shows that the VW<sub>Icap</sub> was 1266.6 m<sup>3</sup>/cap/year in the UAE, which was the largest value in the Arab World.  
194 The UAE is strongly dependent on the import of virtual water, even though the UAE imports only 4.2 billion m<sup>3</sup>/year of virtual  
195 water. The VW<sub>Icap</sub> increased significantly in Saudi Arabia and Libya from 2000 to 2012. Saudi Arabia and Libya imported  
196 about 453.4 and 497.8 m<sup>3</sup>/cap/year, respectively, of virtual water more in 2012 than in 2000. Saudi Arabia was the second  
197 biggest importer in the Arab World, and its VW<sub>Icap</sub> was also the fifth highest in the Arab World. In the condition of increasing  
198 population, the VW<sub>Icap</sub> in the Arab World can be used to estimate the requirement of virtual water import in future, and it  
199 contribute to set water and food management for increasing domestic production and decreasing the VW<sub>Icap</sub> in the Arab  
200 World.

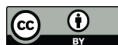

201 We also focused on the volume of virtual water exported to the Arab World by each exporter from 2000 to 2012 (Figure 3).  
202 Through barley trade, Ukraine exported 41.1 billion m<sup>3</sup> of green water to the Arab World, making up 27% of the total green  
203 water imported in the Arab World through barley. In terms of blue water traded through barley, five exporters (Germany,  
204 Australia, the Russian Federation, Ukraine, and India) provided 78% of the total blue water imported in the Arab World  
205 through barley. In the VWT via maize, Argentina contributed 40% of the total amount of green water imported by the Arab  
206 World through maize, but the blue water imported by the Arab World was primarily from the USA. In the VWT via rice, the  
207 major virtual water exporters to the Arab World were India, Thailand, and Pakistan. In particular, 30.4 billion m<sup>3</sup> of blue water  
208 was imported from these countries from 2000 to 2012, which comprised 78% of the blue water imported by the Arab World  
209 through rice. Wheat was the most representative crop imported by the Arab World. The Russian Federation and the USA  
210 provided 25% (140.6 billion m<sup>3</sup>) and 21% (111.2 billion m<sup>3</sup>), respectively, from 2000 to 2012, of the total amount of green  
211 water imported in the Arab World through wheat, and the remaining 55% was divided among several exporters, including  
212 Australia, Canada, France, and Ukraine.

213 **Table 3.** The amount of virtual water imported by the Arab World from 2000 to 2012.

214 **Figure 1.** The total amount of virtual water imported by each country in the Arab World from 2000 to 2012, separated into  
215 green (upper) and blue (lower) water. The pie graph shows the annual import and proportion of each crop, and the size of the  
216 pie indicates the amount of annual virtual water imported from 2000 to 2012.

217 **Figure 2.** Virtual water imports per capita in 2000 and 2012.

218 **Figure 3.** The amounts of green water export (GWE) and blue water export (BWE) from the primary exporters to the Arab  
219 World from 2000 to 2012.

### 220 3.2 Assessment of trade-offs between food self-sufficiency and water-lands savings through food trade in the Arab 221 World

222 Crop import could result in low food self-sufficiency in the Arab World, but water and land savings benefits of VWT. This  
223 study shows which countries were more successful in achieving water or land savings through importing crops. The national  
224 resource managers and trade policy makers in the Arab World would benefit from better understanding of the relationship  
225 between international trade and the preservation of national resources, and these results could provide useful information to  
226 each country in the Arab World.

227 **Table 4** shows that **water saving** by crop import in Saudi Arabia was **8.14 billion m<sup>3</sup>/year**, 3.4 times larger than its internal  
228 water resources (**2.40 billion m<sup>3</sup>**). However, the land saving was 1.5 million ha, making up 0.9% of the total agricultural lands  
229 in Saudi Arabia, which indicates that the croptrade in Saudi Arabia has more significant benefit in terms of water resource  
230 than land resource. Egypt and the UAE were also strongly influenced by the impact of crop import on water saving. On the  
231 other hand, Lebanon saved 0.06 billion m<sup>3</sup> of water resources annually through crop import, which was only 1.3% of its internal  
232 water resources. However, the crop import could bring a large amount of land saving; **for example**, about 0.24 million ha could  
233 be saved by crop import, comprising over **30%** of the agricultural area in Lebanon. In addition, in Jordan and Kuwait, crop  
234 imports could **have a strong impact on land saving**.

235 However, increasing food imports is also correlated to decreasing domestic food production. Accordingly, it is important to  
236 understand the trade-off between water saving and food self-sufficiency in the Arab World. In this study, we defined self-  
237 sufficiency of crops as the ratio of imported crops to total consumption, and estimated the amount of blue water footprint for  
238 increasing self-sufficiency of crops by 1% in comparison to average self-sufficiency from 2000 to 2012, as shown in Table 5.  
239 For example, the average self-sufficiency of wheat in Egypt from 2000 to 2012 was 47.64 % and 278.77 million m<sup>3</sup> irrigation  
240 water would be required to increase self-sufficiency by 1%, in order to reach 48.64 %. The self-sufficiency of wheat in Saudi  
241 Arabia was 74.02 % and 118.11 million m<sup>3</sup> for increasing self-sufficiency by 1%. In contrast, the self-sufficiency of wheat in  
242 Tunisia was 46.05 % but the water requirement for increasing self-sufficiency by 1% was only 3.84 million m<sup>3</sup>. As shown in



243 results, increase of food security accompanies a lot of water requirement in the Arab World and these results can give the  
244 useful information for analyzing trade-off between food and water securities in the Arab World in terms of sustainable  
245 development.

246 **Table 4.** The ratio of saved water and lands to internal water resources and agricultural land area in the Arab World

247 **Table 5.** Water requirement for increasing 1 % self-sufficiency of study crops in comparison with average self-sufficiency in  
248 the Arab World from 2000 to 2012

### 249 3.3 Analysis of structural changes in virtual water trade network centering the Arab World

250 The VWT is regarded as significant element for sustainable water and food management in the Arab World where water is  
251 scarce. Accordingly, in this study we analysed the change of structural connectivity of VWT network in the Arab World using  
252 in-degree centrality from 2000 to 2012, and figured out the vulnerable expansion or reduction in VWT network, which consists  
253 of the volume and number of links. The in-degree centrality based on the number and volume of links in VWT network, which  
254 expressed to non-scaled in-degree centrality (NSInDC) which is based on the number of links, and scaled in-degree centrality  
255 (SInDC) which is based on the volume of links.

256 Figure 4 showed the NSInDC and SInDC in virtual water trade network by each country in the Arab World in 2012. Egypt  
257 and Yemen showed that NSInDC was lower but SInDC was higher than other countries, and it indicates the intensive  
258 connectivity with a few exporters. In contrast, Saudi Arabia had larger SInDC than other countries expect for Egypt and the  
259 NSInDC was also highest in the Arab World. Accordingly, Saudi Arabia has more distributed structure of VWT. In addition,  
260 UAE and Iraq had similar SInDC in 2012 but NSInDC was quite different; UAE (0.46) and Iraq (0.27). Furthermore, SInDC  
261 in Morocco (96.45) was larger than UAE (83.41) but NSInDC in Morocco (0.26) smaller than UAE (0.46). In comparison to  
262 UAE, Morocco had intensive connection with less exporters than UAE.

263 Figure 5 showed the temporal changes of NSInDC and the SInDC during two periods (2000–2006 and 2006–2012). In these  
264 results, the Arab World countries were divided into four types (I–IV). Type I countries show a robust expansion in the virtual  
265 water import, and the countries in this type increased the connectivity and volume of virtual water imported, simultaneously.  
266 Type II countries increased the volume of virtual water imported without expansion of connectivity. Type III and type IV  
267 countries show reductions in the virtual water import with and without reduction of connectivity, respectively. In the early  
268 2000s, most of countries in Arab World tried to expand their trade structure by increasing both the connectivity to exporters  
269 and the volume of virtual water imported. In Bahrain, Omen, Qatar, Yemen, Saudi Arabia, Lebanon, and UAE NSInDC of the  
270 VWT network increased significantly from 2000 to 2006, which means that the trade connectivity expanded. The expanded  
271 structure of VWT indicates that the Arab countries is connected to various exporters and it can bring the security of import. In  
272 particular, import of food crops is essential factor in food security in the Arab World, even if they try to increase food self-  
273 sufficiency through increasing domestic production. However, Egypt had the largest SInDC but NSInDC was located 6th in  
274 the Arab World. In 2006, Egypt expanded the connectivity in VWT network, as shown in increasing NSInDC, and Saudi  
275 Arabia also expanded the connectivity.

276 However, the VWT has become a more vulnerable structure in the Arab World in recent years. Most of the Arab countries  
277 increased the volume of virtual water imported, but the number of exporters that linked to the Arab countries decreased or  
278 increased little from 2006 to 2012. In particular, in 2012 most of countries kept the connectivity or reduced it except for Algeria,  
279 Iraq, Libya, and UAE. For example, virtual water imported in Lebanon significantly increased from 2006 to 2012 but NSInDC  
280 decreased in 2012. Figure 6 showed the change of virtual water import in Lebanon in 2000, 2006, and 2012. In 2000 Lebanon  
281 imported most of virtual water from the USA, Argentina, and Australia, thus VWT in Lebanon was strongly dependent on  
282 these exporters. However, Lebanon expanded the VWT in 2006 and Russian federation, Turkey, and Kazakhstan contributed  
283 to virtual water import in Lebanon. Accordingly, the structure of VWT in Lebanon was getting to a distributed network.  
284 However, the VWT in 2012 showed it was dominated by Ukraine and Russian federation even if Lebanon imported more

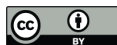

285 virtual water in 2012 than 2006. Therefore, Lebanon should consider not only amount of virtual water but also structure of  
286 VWT for sustainable food security in the condition of strong dependency on crop import.  
287 These results indicate that the dependence of the Arab World on virtual water import accelerated recently with the large  
288 increase in volume of virtual water imported. However, the connectivity of the VWT in the Arab World has not increased as  
289 much as the volume of virtual water imported increased.

290 **Figure 4.** In-degree centrality of each country in the Arab World in 2012

291 **Figure 5.** Country types in the Arab World according to the rate of increase in the in-degree centrality from 2000 to 2012

292 **Figure 6.** Virtual water import from exporters to Lebanon in 2000, 2006, and 2012

293

294 We also analyzed the influence of each country on entire VWT network centering the Arab World using eigenvector centrality,  
295 as shown on Figure 7. In 2000, Egypt and Saudi Arabia were identified as the most influential importers in the Arab World  
296 and the USA and Australia were the most influential exporters. Accordingly, the entire VWT in the Arab World could be  
297 affected by these importers and exporters, and it means that the change of trade policy or food management in these countries  
298 could change the structure of VWT in the Arab World. In 2006 and 2012, the influential countries in the Arab World still were  
299 Egypt and Saudi Arabia but the influential exporters moved to Russian federation and Ukraine and Brazil. These results might  
300 contribute to understanding the key player in entire VWT centering the Arab World and other countries in the Arab World  
301 should observe the behavior of influential countries closely.

302 **Figure 7.** Eigenvector centrality of virtual water trade network in the Arab World at 2000, 2006, and 2012

### 303 **3.4 The importance and limitations of concept of virtual water in the Arab World from a policy perspective**

304 Generally, the VWT is more related to resource management in exporting countries rather than importing countries because  
305 of the embedded water in food trade indicates water resource that is consumed for producing food products in the exporting  
306 country. However, VWT is also considered as an important issue in importing countries in terms of water and food security.  
307 For example, the reduction of VWT might be related to water consumption by replacing imported food products by domestic  
308 food products.

309 As mentioned above, the VWT can be a major resource in the Arab World. Accordingly, vulnerable VWT, for example low  
310 connectivity, can be a risk element for future food security risk management. In particular, the Arab World is strongly  
311 dependent on food products from exporting countries, and it implies a strong dependency on water resource from exporting  
312 countries. Therefore, water shortages or low food production in exporting countries might cause increasing food price in the  
313 Arab World but also increasing domestic water use for increasing domestic food production.

314 In this study, we believe that the VWT in the Arab World can be the key factor for bridging water and food, and it is important  
315 to quantify the influence of trade on water and food management. In addition, this study revealed vulnerability (or robust)  
316 expansion (or reduction) and influential trader in VWT network in the Arab World through in-degree and eigenvector centrality  
317 indices. If a country in the Arab World has low connectivity but a large amount of virtual water import, this country should  
318 reevaluate their vulnerable trade structure and change the trade policy or water-food management.

319 However, the application of the concept of VWT is under critical discussion (Wichelns, 2010). First, water footprints bring  
320 new concepts of water management, but it is also difficult to link to operating water resource systems. Water footprint is more  
321 related to water consumption rather than water supply. We can quantify water requirement for producing food products or  
322 water saving by importing them using water footprint and VWT. However, the operation of water facilities, for example  
323 reservoir, desalination plant, and ground water pumping station, are affected by monthly rainfall and ground water level,  
324 development of technology, fertilizer usage, irrigation scheduling and system. Therefore, we need to realize that water footprint  
325 can be changed by various factors. Second, VWT could contribute to connecting water management to food security; however,  
326 food trade is affected by the scarcity or affluence of other important resource such as capital, labor, and land (Biewald et al.,





327 2014). In particular, economic values such as price of food products is the main driver in global food trade but there is no  
328 global value established for virtual water. Therefore, it is difficult to apply virtual water to trade policy in terms of economic  
329 efficiency. Therefore, policy makers or resource manager in the Arab World should consider not only the effects of VWT but  
330 also the difficulty in adapting virtual water to policies for resource management.

331 Despite these limitations, this study attempted to analyze the VWT through various perspectives. Through the in-degree  
332 centrality of the VWT network, we identified that most countries in the Arab World increased connections with exporters and  
333 the volume of virtual water imported between 2000 and 2006. However, most countries increased the volume of virtual water  
334 imported without increasing the expansion of connections between 2006 and 2012. These results could underscore the fact  
335 that the VWT structure has not recently increased in robustness. We believe that virtual water has a role in achieving  
336 sustainable water, land, and food security, even if there are limitations and difficulties in applying the virtual water concept.

#### 337 **4. Conclusions**

338 The VWT, importing water in virtual form, could be a major water portfolio that dominates water management in the water-  
339 scarce countries of the Arab World. Since the virtual water concept was introduced, various studies have been conducted to  
340 quantify the volume of the VWT. In water-deficit areas such as the Arab World, the VWT can offer new perspectives for  
341 understanding and solving water stress and scarcity. The amount of virtual water imported is regarded as the most important  
342 factor in determining water and food security, and the results of water and land savings by crop import in the Arab World  
343 could show the importance of international trade.

344 In summary, policy makers can benefit by considering both the quantitative impacts of VWT and the structural change of  
345 VWT such as vulnerable expansion (or reduction) in the Arab World. The intensity and connectivity of VWT, which were  
346 analysed in this study, can be major component for integrating food and water policy in the Arab World, and this study might  
347 give important information to policy maker for evaluating future scenarios about resource management toward sustainability  
348 in the Arab World.

#### 349 **Acknowledgment**

350 We appreciate the use of the national water footprint data from Mekonnen and Hoekstra (2010). The international trade data,  
351 crop production, and harvested **arear** from 2000 to 2012 **are available from the FAOSTAT**.

352

#### 353 **References**

354 Abahussain, A.A., Abdu, A.S., Al-Zubari, W.K., El-Deen, N.A., and Abdul-Raheem, M.: Desertification in the Arab Region:  
355 analysis of current status and trends. *Journal of Arid Environments*, 51(4), 521-545, 2002.

356 Aldaya, M.M., Allan, J.A., and Hoekstra, A.Y.: Strategic importance of green water in international crop trade. *Ecological  
357 Economics*, 69, 887-894., 2010.

358 Allan, J.: Fortunately there are substitutes for water otherwise our hydro-political futures would be impossible In: *Priorities  
359 for water resources allocation and management*, ODA, London 13-26, 1993.

360 Antonelli, M., Laio, F., and Tamea, S.: Food security and VWT in the Middle East and North Africa. *International Journal of  
361 Water Resources Development*, 31(3), 326-342, 2015.

362 Biewald, A., Rolinski, S., Camoen, H.L., Schmitz, C., and Dietrich, J.P.: Valuing the impact of trade on local blue water.  
363 *Ecological Economics*, 101, 43-53, 2014.



- 364 Dalin, C., Konar, M., Hanasaki, N., Rinaldo, A., and Rodriguez-Iturbe, I.: Evolution of the global VWT network. *Proc. Natl.*  
365 *Acad. Sci. U.S.A.*, 109(16), 5989-5994, 2012.
- 366 Fader, M., Gerten, G., Thammer, M., Heinke, J., Lotze-Campen, H., Lucht, W., and Cramer, W.: Internal and external green-  
367 blue agricultural water footprints of nations, and related water and land savings through trade. *Hydrology and Earth System*  
368 *Sciences*, 15, 1641-1660, 2011.
- 369 Falkenmark, M.: Land-water linkages: a synopsis. *Land and Water integration and river basin management. FAO Land and*  
370 *Water Bulletin*, 1, 15-16, 1995.
- 371 Falkenmark, M., and Lannerstad, M.: Food security in water-short countries- Coping with carrying capacity overshoot.  
372 Fourth Botin Foundation Water Workshop, 2010.
- 373 Food and Agriculture Organization of the United Nations (FAO): on-line database. Retrieved from  
374 <http://www.fao.org/nr/water/aquastat/main/index.stm>, 2014.
- 375 Freeman, L.C.: Centrality in social network: conceptual clarification. *Social Networks*, 1, 215-239, 1979.
- 376 Gleick, P. H.: The world's water 2000–2001. The biennial report on freshwater resources, 19-38, 2000.
- 377 Government Office for Science, London.: Foresight. *The Future of Food and Farming*, 2011.
- 378 Hanjra, M., and Qureshi, M.: Global water crisis and future food security in an era of climate change. *Food Policy*, 35, 365–  
379 377, 2010.
- 380 Hennessy, K. B., Fitzharris, B., Bates, B. C., Harvey, N., Howden, M., Hughes, L., ... and Warrick, R.: Australia and New  
381 Zealand: climate change 2007: impacts, adaptation and vulnerability: contribution of Working Group II to the Fourth  
382 Assessment Report of the Intergovernmental Panel on Climate Change, 2007.
- 383 Hoekstra, A.Y.: VWT: Proceedings of the international expert meeting on VWT. *Value of Water Research Series No.12*,  
384 UNESCO-IHE: Delft, the Netherland, 2003.
- 385 Hoekstra, A.Y., and Chapagain, A.K.: *Globalisation of Water: Sharing the Planet's Freshwater Resources*. Blackwell  
386 Publishing, 2008.
- 387 Hoekstra, A.Y., and Hung, P.Q.: Globalisation of water resources: international virtual water flows in relation to crop trade.  
388 *Global Environment Change*, 15, 45-56, 2005.
- 389 Immerzeel, W., Droogers, P., Terink, W., Hoogeveen, J., Hellegers, P., Bierkens, M., and van Beek, R.: Middle-East and  
390 Northern Africa water outlook. *World Bank Study. Future Water Report*, 98, 2011.
- 391 Konar, M., Dalin, C., Hanasaki, N., Rinaldo, A., and Rodriguez-Iturbe, I.: Temporal dynamics of blue and green VWT  
392 networks. *Water Resources Research*, 48(7), 2012.
- 393 Lee, S.H., Mohtar, R.H., Choi, J.Y., and Yoo, S.H.: Analysis of the characteristics of the global VWT network using degree  
394 and eigenvector centrality, with a focus on food and feed crops. *Hydrology and Earth System Sciences*, 20(10), 4223, 2016.
- 395 Mekonnen, M.M., and Hoekstra, A.Y.: The green, blue and grey water footprint of crops and derived crop products. *Value*  
396 *of Water Research Series No.47*, UNESCO-IHE: Delft, the Netherland., 2010.
- 397 Milly, P. C., Dunne, K. A., and Vecchia, A. V.: Global pattern of trends in streamflow and water availability in a changing  
398 climate. *Nature*, 438(7066), 347-350, 2005.
- 399 **Molden, D.: Water for food, water for life: a comprehensive assessment of water management in agriculture: summary.**  
400 **IWMI Books, Reports H039769 International Water Management Institute, 2007.**
- 401 Novo, P., Garrido, A., and Varela-Ortega, C.: Are virtual water “flows” in Spanish grain trade consistent with relative water  
402 scarcity?. *Ecological Economics*, 68, 1454-1464, 2009.
- 403 Oki, T., and Kanae, S.: VWT and water resource. *Water Science & Technology*, 49(7), 203-209, 2004.
- 404 Schyns, J.F., and Hoekstra, A.Y.: The Added Value of Water Footprint Assessment for National Water Policy: A Case Study  
405 for Morocco. *Plos ONE*, 9(6), e99705, 2014.

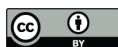

- 406 Tolba, M. K., and Saab, N. W.: Arab environment: Climate change. In Beirut, Arab Forum for Environment and  
407 Development, 2009.
- 408 Wichelns, D.: Virtual water: A helpful perspective, but not a sufficient policy criterion. *Water Resources*  
409 *Management*, 24(10), 2203-2219, 2010.
- 410 World Bank.: *Water in the Arab World: Management Perspectives and Innovations*, edited by N. Vijay Jagannathan, Ahmed  
411 Shawky Mohamed, Alexander Kremer. Washington DC: World Bank, 2009.
- 412 Yang, H., Wang, L., Abbaspour, K.C., and Zehnder, A.J.B.: VWT: an assessment of water use efficiency in the international  
413 food trade. *Hydrology and Earth System Sciences*, 10, 443-454, 2006.
- 414



415

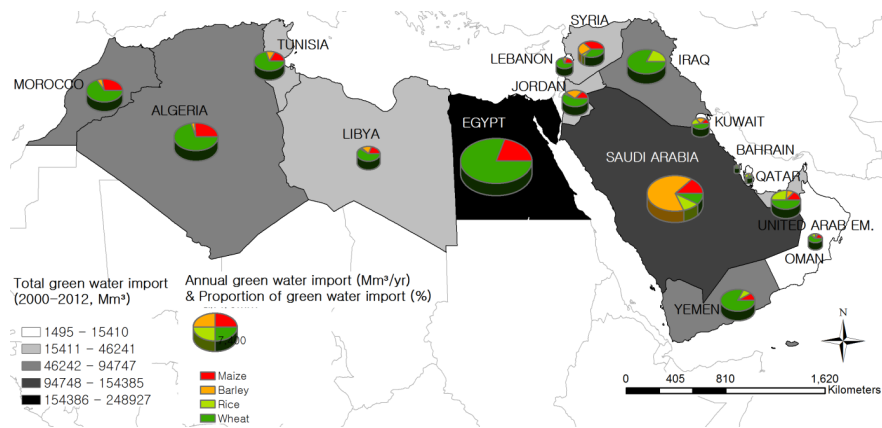

416

417

(a) Green water imports

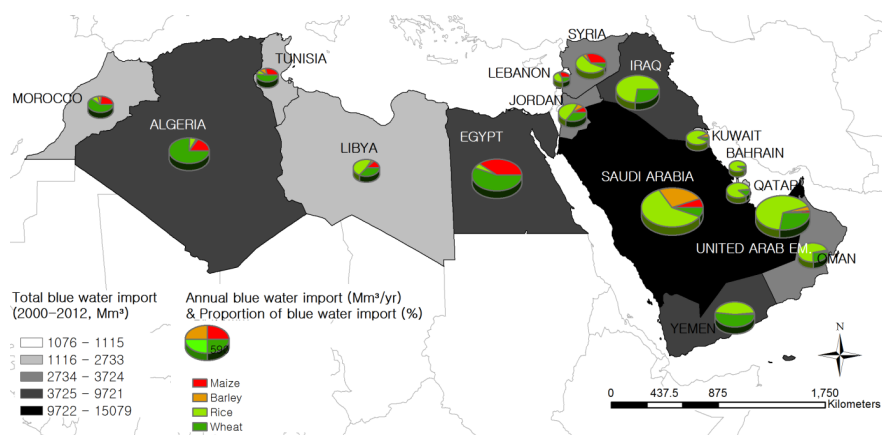

418

419

(b) Blue water imports

420 **Figure 1.** The total amount of virtual water imported by each country in the Arab World from 2000 to  
 421 2012, separated into green (upper) and blue (lower) water. The pie graph shows the annual import and  
 422 proportion of each crop, and the size of the pie indicates the amount of annual virtual water imported  
 423 from 2000 to 2012.

424

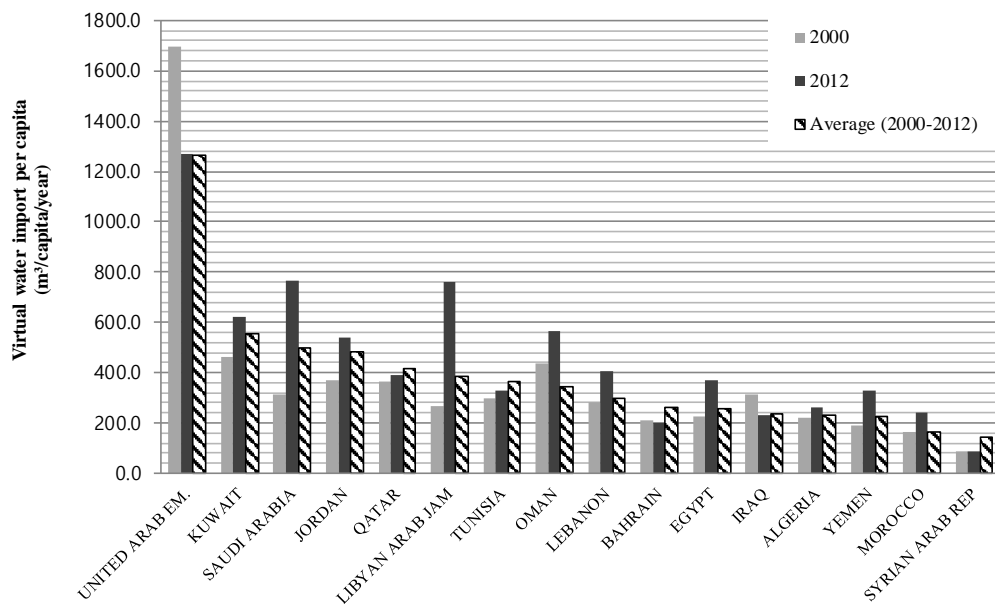

425

426

427

**Figure 2.** Virtual water import per capita in 2000 and 2012.



428

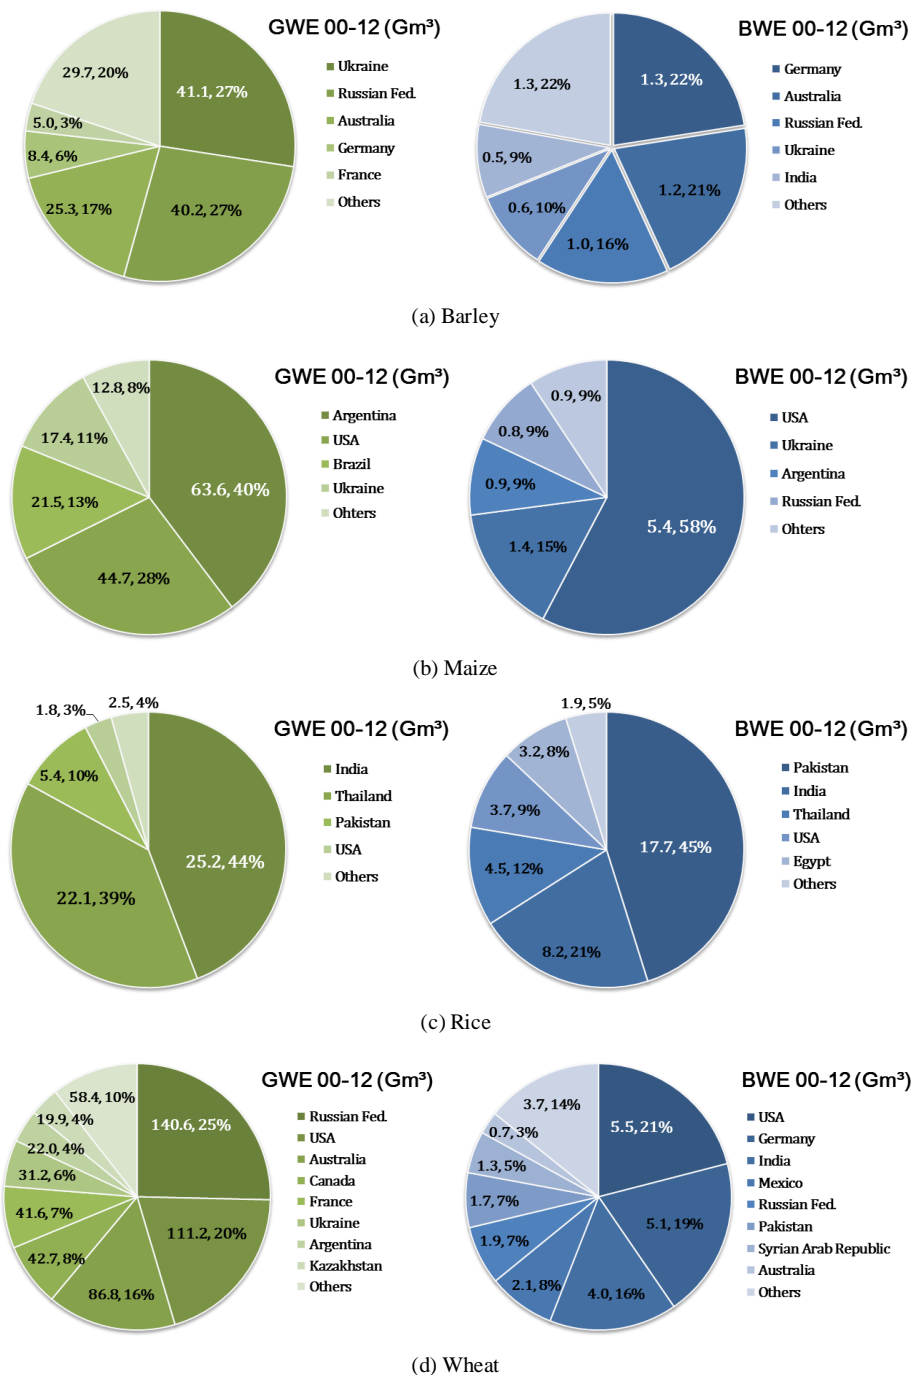

429 **Figure 3.** The amounts of green water export (GWE) and blue water export (BWE) from the primary  
 430 exporters to the Arab World from 2000 to 2012

431

432

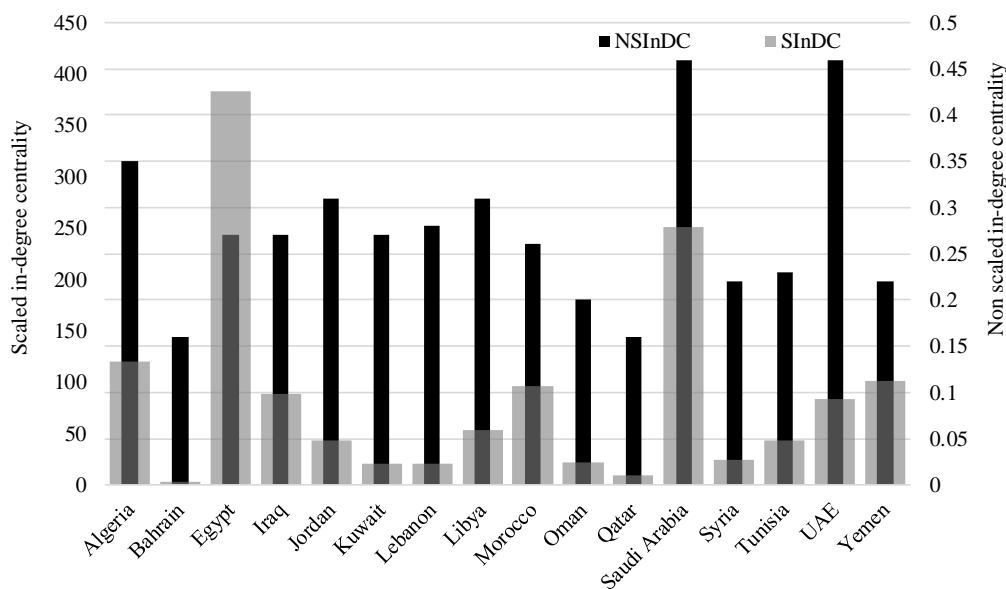

433  
 434  
 435  
 436

Figure 4. In-degree centrality of each country in the Arab World in 2012

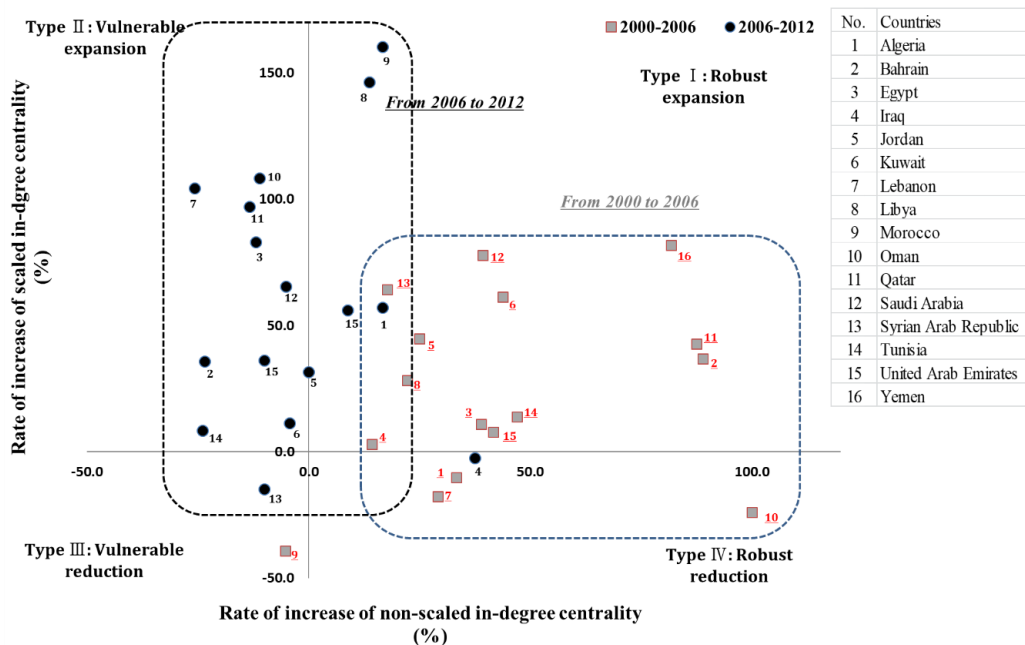

437  
 438  
 439  
 440  
 441

Figure 5. Country types in the Arab World according to the rate of increase in the in-degree centrality from 2000 to 2012

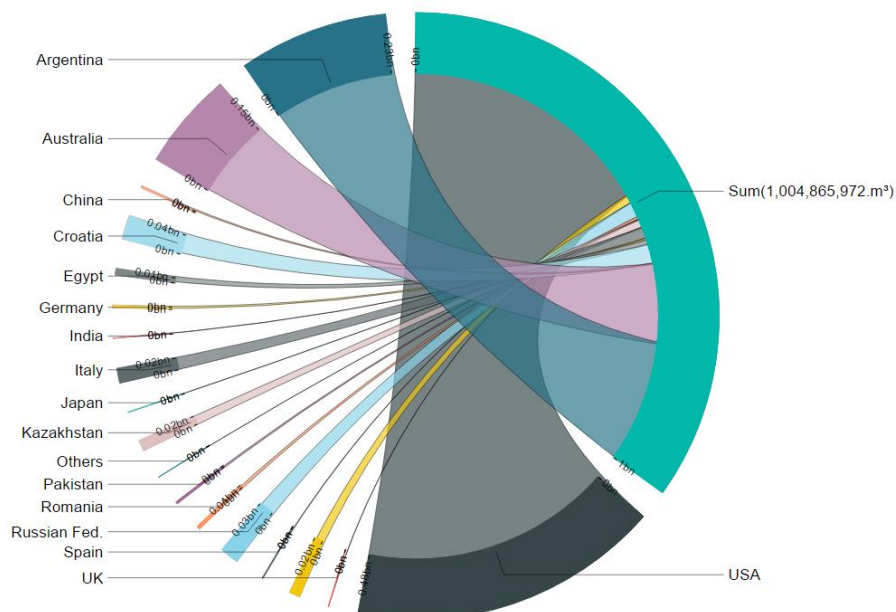

(a) 2000

442  
 443  
 444

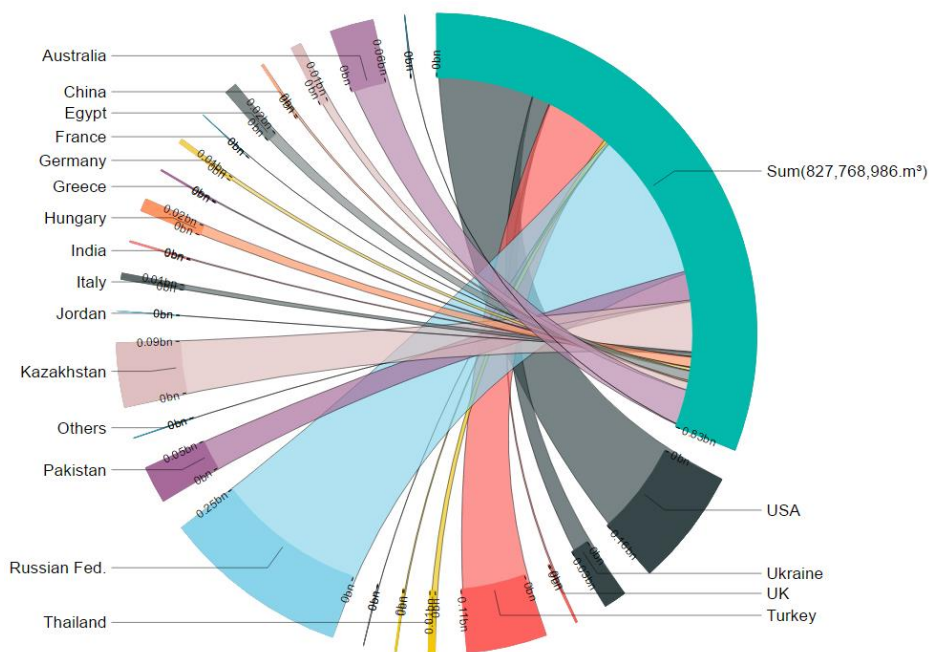

(b) 2006

445  
 446  
 447  
 448



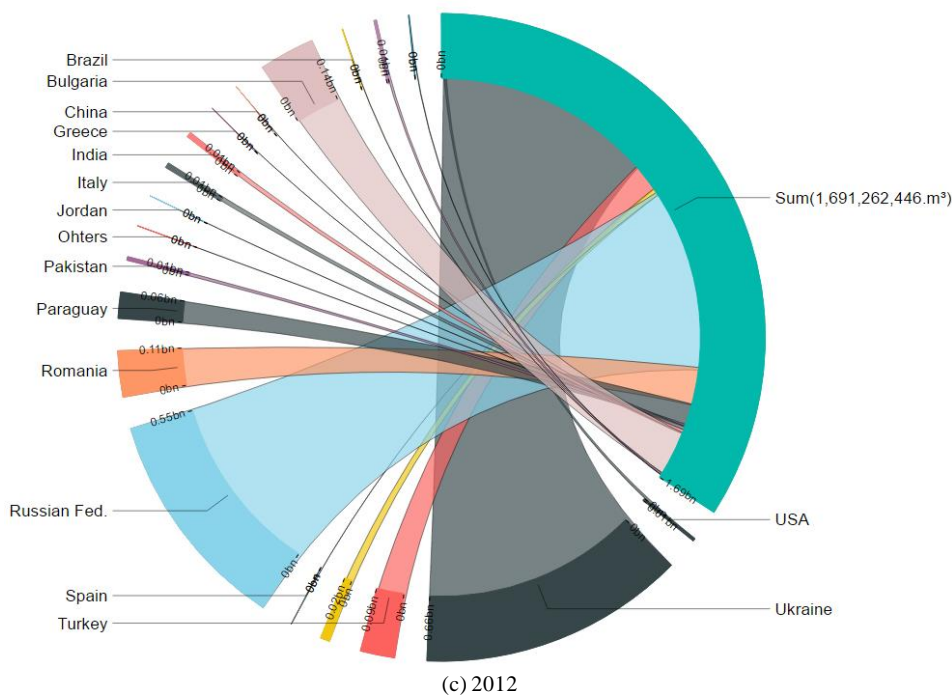

449  
 450  
 451  
 452  
 453  
 454

**Figure 6.** Virtual water import from exporters to Lebanon in 2000, 2006, and 2012

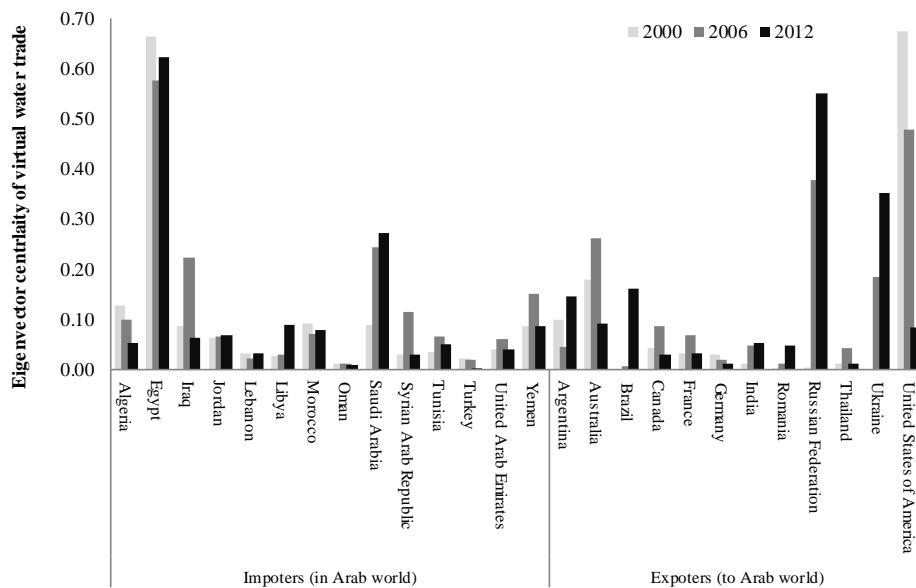

455  
 456  
 457  
 458

**Figure 7.** Eigenvector centrality of virtual water trade network in the Arab World at 2000, 2006, and 2012



459 **Table 1.** The amount of crops imported by the Arab World from 2000 to 2012

| Importers<br>in the Arab World | Crop import from 2000 to 2012         |       |        |       |                                  |        |        |       |
|--------------------------------|---------------------------------------|-------|--------|-------|----------------------------------|--------|--------|-------|
|                                | Total import<br>(10 <sup>6</sup> ton) |       |        |       | Annual import<br>(1000 ton/year) |        |        |       |
|                                | Barley                                | Maize | Wheat  | Rice  | Barley                           | Maize  | Wheat  | Rice  |
| ALGERIA                        | 3.04                                  | 27.46 | 69.73  | 0.61  | 234                              | 2,113  | 5,364  | 47    |
| BAHRAIN                        | 0.00                                  | 0.09  | 0.52   | 0.62  | 0                                | 7      | 40     | 48    |
| EGYPT                          | 0.32                                  | 65.96 | 107.85 | 0.60  | 25                               | 5,074  | 8,296  | 46    |
| IRAQ                           | 0.25                                  | 0.23  | 33.10  | 9.65  | 35                               | 19     | 2,546  | 742   |
| JORDAN                         | 6.34                                  | 5.02  | 10.30  | 1.79  | 488                              | 386    | 793    | 137   |
| KUWAIT                         | 2.32                                  | 1.75  | 3.70   | 2.23  | 178                              | 134    | 285    | 171   |
| LEBANON                        | 0.64                                  | 3.77  | 4.78   | 0.60  | 49                               | 290    | 367    | 46    |
| LIBYA                          | 2.94                                  | 5.58  | 10.45  | 1.59  | 226                              | 429    | 804    | 123   |
| MOROCCO                        | 5.10                                  | 18.81 | 38.93  | 0.17  | 393                              | 1,447  | 2,994  | 13    |
| OMAN                           | 0.47                                  | 1.29  | 3.75   | 1.54  | 36                               | 100    | 288    | 119   |
| QATAR                          | 0.43                                  | 0.05  | 0.62   | 1.14  | 33                               | 4      | 48     | 87    |
| SAUDI ARABIA                   | 81.29                                 | 20.80 | 9.11   | 13.12 | 6,253                            | 1,600  | 701    | 1,009 |
| SYRIA                          | 5.11                                  | 17.15 | 5.91   | 2.62  | 393                              | 1,319  | 455    | 202   |
| TUNISIA                        | 5.30                                  | 9.59  | 19.84  | 0.23  | 407                              | 738    | 1,526  | 17    |
| UAE                            | 2.80                                  | 5.20  | 13.83  | 8.88  | 215                              | 400    | 1,064  | 683   |
| YEMEN                          | 0.02                                  | 4.47  | 27.26  | 3.63  | 3                                | 344    | 2,097  | 279   |
| <b>Total</b>                   | 116.4                                 | 187.2 | 359.7  | 49.0  | 8,968                            | 14,404 | 27,668 | 3,769 |

Source: FAOSTAT (<http://www.fao.org/faostat/>)

460



461 **Table 2** Cultivation area and production of four major crops in the Arab World.

| Importers<br>in the Arab World | Average cultivation area from 2000 to 2012 (ha/year) |         |           |         |
|--------------------------------|------------------------------------------------------|---------|-----------|---------|
|                                | Barley                                               | Maize   | Wheat     | Rice    |
| ALGERIA                        | 760,545                                              | 308     | 1,658,197 | -       |
| EGYPT                          | 68,103                                               | 876,153 | 1,180,644 | 625,626 |
| IRAQ                           | 914,074                                              | 128,842 | 1,451,219 | 85,182  |
| JORDAN                         | 31,158                                               | 947     | 20,116    | -       |
| KUWAIT                         | 1,058                                                | 290     | 173       | -       |
| LEBANON                        | 13,515                                               | 949     | 45,380    | -       |
| LIBYA                          | 191,641                                              | 1,356   | 165,469   | -       |
| MOROCCO                        | 2,118,032                                            | 226,903 | 2,910,977 | 5,876   |
| OMAN                           | 1,002                                                | -       | 426       | -       |
| QATAR                          | 947                                                  | 94      | 15        | -       |
| SAUDI ARABIA                   | 12,279                                               | 16,689  | 374,414   | -       |
| SYRIA                          | 1,313,101                                            | 53,405  | 1,667,229 | -       |
| TUNISIA                        | 385,189                                              | -       | 722,038   | -       |
| UAE                            | 14                                                   | 144     | 18        | -       |
| YEMEN                          | 39,276                                               | 40,774  | 110,138   | -       |

  

| Importers<br>in the Arab World | Average production from 2000 to 2012 (ton/year) |           |           |           |
|--------------------------------|-------------------------------------------------|-----------|-----------|-----------|
|                                | Barley                                          | Maize     | Wheat     | Rice      |
| ALGERIA                        | 1,049,710                                       | 1,128     | 2,313,464 | -         |
| EGYPT                          | 134,034                                         | 6,812,845 | 7,549,253 | 6,023,684 |
| IRAQ                           | 751,099                                         | 307,682   | 2,009,972 | 232,040   |
| JORDAN                         | 22,757                                          | 17,514    | 23,379    | -         |
| KUWAIT                         | 2,191                                           | 5,855     | 345       | -         |
| LEBANON                        | 24,834                                          | 3,579     | 126,623   | -         |
| LIBYA                          | 94,107                                          | 2,997     | 128,149   | -         |
| MOROCCO                        | 1,867,670                                       | 159,127   | 4,200,596 | 36,936    |
| OMAN                           | 3,027                                           | -         | 1,432     | -         |
| QATAR                          | 2,841                                           | 1,329     | 34        | -         |
| SAUDI ARABIA                   | 68,366                                          | 86,181    | 1,997,598 | -         |
| SYRIA                          | 817,609                                         | 211,675   | 4,008,420 | -         |
| TUNISIA                        | 411,431                                         | -         | 1,302,438 | -         |
| UAE                            | 111                                             | 2,931     | 74        | -         |
| YEMEN                          | 32,248                                          | 57,329    | 173,437   | -         |

462 Source: FAOSTAT (<http://www.fao.org/faostat/>)

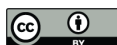

463 **Table 3** The amount of virtual water imported by the Arab World from 2000 to 2012.

| Importers<br>in the Arab World | Green water import<br>(10 <sup>6</sup> m <sup>3</sup> /year) |                 |                 |                | Blue water import<br>(10 <sup>6</sup> m <sup>3</sup> /year) |              |                |                |
|--------------------------------|--------------------------------------------------------------|-----------------|-----------------|----------------|-------------------------------------------------------------|--------------|----------------|----------------|
|                                | Barley                                                       | Maize           | Wheat           | Rice           | Barley                                                      | Maize        | Wheat          | Rice           |
| ALGERIA                        | 242.0                                                        | 1,883.6         | 5,104.8         | 57.8           | 7.8                                                         | 76.6         | 371.1          | 33.5           |
| BAHRAIN                        | 0.4                                                          | 7.5             | 62.7            | 44.4           | 0.2                                                         | 0.3          | 7.1            | 78.2           |
| EGYPT                          | 37.3                                                         | 3,798.4         | 15,254.1        | 58.4           | 1.1                                                         | 295.6        | 418.6          | 32.5           |
| IRAQ                           | 33.2                                                         | 16.7            | 4,645.8         | 1,027.8        | 2.2                                                         | 1.3          | 153.9          | 404.8          |
| JORDAN                         | 656.8                                                        | 364.2           | 1,483.9         | 81.2           | 20.8                                                        | 20.8         | 84.5           | 115.0          |
| KUWAIT                         | 257.0                                                        | 159.1           | 557.7           | 211.6          | 9.7                                                         | 2.3          | 10.2           | 138.1          |
| LEBANON                        | 84.7                                                         | 211.0           | 749.5           | 30.0           | 2.3                                                         | 25.6         | 18.9           | 36.0           |
| LIBYA                          | 359.6                                                        | 408.9           | 1,245.4         | 56.0           | 8.4                                                         | 26.8         | 75.3           | 99.7           |
| MOROCCO                        | 318.6                                                        | 1,383.2         | 3,345.0         | 8.9            | 12.1                                                        | 46.1         | 118.8          | 20.4           |
| OMAN                           | 52.7                                                         | 123.2           | 470.8           | 107.6          | 5.4                                                         | 4.1          | 67.8           | 201.3          |
| QATAR                          | 50.9                                                         | 6.4             | 76.4            | 77.6           | 2.4                                                         | 0.3          | 19.1           | 146.9          |
| SAUDI ARABIA                   | 8,154.5                                                      | 1,521.4         | 974.0           | 1,225.9        | 324.3                                                       | 68.9         | 70.8           | 696.0          |
| SYRIA                          | 556.4                                                        | 947.3           | 900.0           | 120.8          | 12.8                                                        | 90.2         | 17.8           | 165.6          |
| TUNISIA                        | 409.8                                                        | 611.7           | 2,507.7         | 27.8           | 16.0                                                        | 40.7         | 73.9           | 11.6           |
| UAE                            | 315.7                                                        | 465.8           | 1,671.8         | 859.5          | 28.5                                                        | 14.3         | 249.3          | 612.5          |
| YEMEN                          | 3.1                                                          | 406.1           | 3,597.3         | 392.7          | 1.6                                                         | 8.2          | 247.3          | 220.8          |
| <b>Total</b>                   | <b>11,532.9</b>                                              | <b>12,314.5</b> | <b>42,646.9</b> | <b>4,388.0</b> | <b>455.5</b>                                                | <b>722.1</b> | <b>2,004.4</b> | <b>3,012.9</b> |

464  
 465  
 466

**Table 4** The ratio of saved water and lands to internal resources and agricultural land area in the Arab World

| Importers    | Internal water<br>resources*<br>(10 <sup>6</sup> m <sup>3</sup> ) | National<br>blue water saving<br>(10 <sup>6</sup> m <sup>3</sup> ) | Agricultural<br>land*<br>(1000 ha) | National<br>land saving**<br>(1000 ha) |
|--------------|-------------------------------------------------------------------|--------------------------------------------------------------------|------------------------------------|----------------------------------------|
| ALGERIA      | 11.25                                                             | 0.56                                                               | 41432                              | 4902                                   |
| EGYPT        | 1.80                                                              | 13.05                                                              | 3761                               | 1964                                   |
| IRAQ         | 35.20                                                             | 12.17                                                              | 9230                               | 2398                                   |
| JORDAN       | 0.68                                                              | 1.02                                                               | 1057                               | 1531                                   |
| KUWAIT       | -                                                                 | 1.14                                                               | 154                                | 229                                    |
| LEBANON      | 4.80                                                              | 0.06                                                               | 658                                | 238                                    |
| LIBYA        | 0.70                                                              | 1.73                                                               | 15355                              | 1704                                   |
| MOROCCO      | 29.00                                                             | 5.39                                                               | 30401                              | 6001                                   |
| OMAN         | 1.40                                                              | 0.69                                                               | 1469                               | 100                                    |
| QATAR        | 0.06                                                              | 0.17                                                               | 68                                 | 32                                     |
| SAUDI ARABIA | 2.40                                                              | 8.14                                                               | 173295                             | 1501                                   |
| SYRIA        | 7.13                                                              | 2.36                                                               | 13921                              | 1417                                   |
| TUNISIA      | 4.20                                                              | 0.21                                                               | 9943                               | 1288                                   |
| UAE          | 0.15                                                              | 0.82                                                               | 382                                | 387                                    |
| YEMEN        | 2.10                                                              | 6.05                                                               | 23546                              | 1656                                   |

467 \* World Bank 2014

468 \*\* Land saving considered barley, maize, and wheat except for rice because of lack of data.

469



470 **Table 5** Water requirement for increasing 1 % self-sufficiency of study crops in comparison with average self-sufficiency in  
 471 the Arab World from 2000 to 2012

| Importers    | Average self-sufficiency from 2000 to 2012 (%) |        |        | Additional irrigation water requirement (10 <sup>6</sup> m <sup>3</sup> ) |        |        |
|--------------|------------------------------------------------|--------|--------|---------------------------------------------------------------------------|--------|--------|
|              | Barley                                         | Maize  | Wheat  | Barley                                                                    | Maize  | Wheat  |
| ALGERIA      | 81.77%                                         | 0.05%  | 30.13% | 5.88                                                                      | 1.74   | 7.27   |
| EGYPT        | 84.28%                                         | 57.31% | 47.64% | 18.31                                                                     | 307.44 | 278.77 |
| IRAQ         | 95.55%                                         | 94.18% | 44.12% | 983.99                                                                    | 122.93 | 233.96 |
| JORDAN       | 4.46%                                          | 4.34%  | 2.86%  | 1.73                                                                      | 0.35   | 8.40   |
| KUWAIT       | 1.22%                                          | 4.19%  | 0.12%  | 4.16                                                                      | 0.31   | 6.60   |
| LEBANON      | 33.63%                                         | 1.22%  | 25.65% | 0.00                                                                      | 0.04   | 0.65   |
| LIBYA        | 29.40%                                         | 0.69%  | 13.75% | 8.32                                                                      | 0.36   | 16.87  |
| MOROCCO      | 82.62%                                         | 9.91%  | 58.39% | 10.88                                                                     | 57.38  | 43.33  |
| OMAN         | 7.76%                                          | 0.00%  | 0.49%  | 1.00                                                                      | 0.08   | 5.70   |
| QATAR        | 7.93%                                          | 24.94% | 0.07%  | 0.67                                                                      | 0.04   | 0.79   |
| SAUDI ARABIA | 1.08%                                          | 5.11%  | 74.02% | 51.64                                                                     | 22.81  | 118.11 |
| SYRIA        | 67.54%                                         | 13.83% | 89.81% | 1.60                                                                      | 28.28  | 213.67 |
| TUNISIA      | 50.27%                                         | 0.00%  | 46.05% | 1.26                                                                      | 0.61   | 3.84   |
| UAE          | 0.05%                                          | 0.73%  | 0.01%  | 0.17                                                                      | 0.33   | 5.46   |
| YEMEN        | 91.49%                                         | 14.28% | 7.64%  | -                                                                         | 13.98  | 58.54  |

472
